# Supplementary material
Source: PubMed Central journal article supplement (PMC555711)

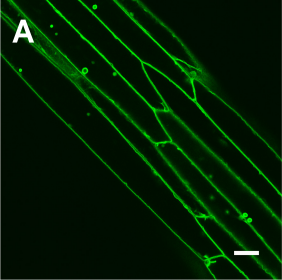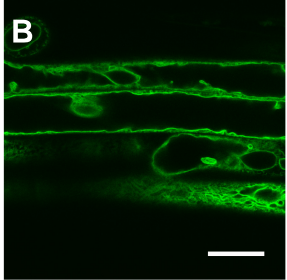

Supplement: pnas_102_13_4902__2.pdf [file pnas_102_13_4902__2.pdf]

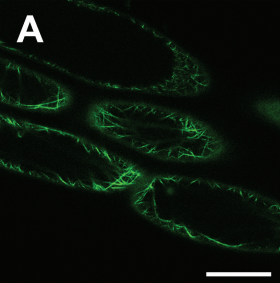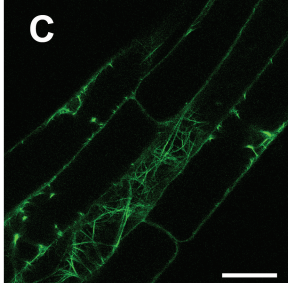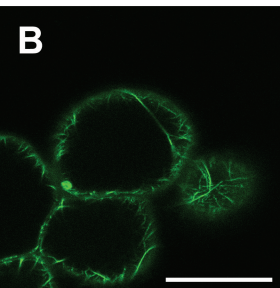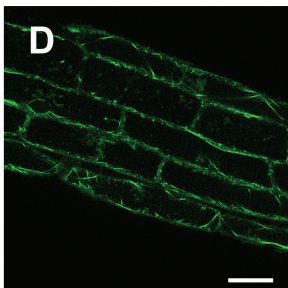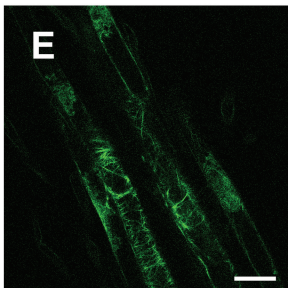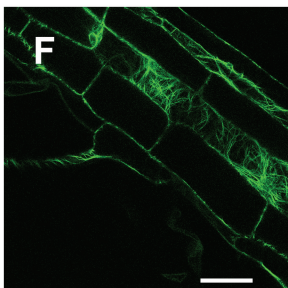

Supplement: pnas_102_13_4902__4.pdf [file pnas_102_13_4902__4.pdf]

germinate seeds  
3 days ↓  
transfer seedlings  
24 h ↓  
turn plates 90°  
24-48 h ↓  
score hypocotyl bending

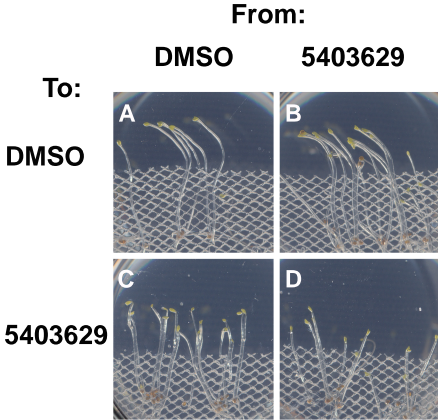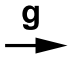

Supplement: pnas_102_13_4902__5.pdf [file pnas_102_13_4902__5.pdf]
